# Supplementary material for: High-resolution FTIR imaging of colon tissues for elucidation of individual cellular and histopathological features
Source: Royal Society of Chemistry journal article supplement (doi:10.1039/c5an01871d), 2015-11-02
Supplement: c5an01871d1.pdf [file c5an01871d1.pdf]

## High-resolution FTIR imaging of colon tissues for elucidation of individual cellular and histopathological features

Jayakrupakar Nallala,<sup>1</sup> Gavin Rhys Lloyd,<sup>2</sup> Neil Shepherd,<sup>3</sup> Nick Stone<sup>1\*</sup>

*1 Biomedical Physics, School of Physics, University of Exeter, EX4 4QL, UK*

*2 Biophotonics Research Unit, Gloucestershire Royal Hospital, Gloucester, GL1 3NN, UK*

*3 Department of Pathology, Gloucestershire Hospitals NHS Foundation Trust, Gloucester, GL1 3NN, UK*

\*e-mail: [n.stone@exeter.ac.uk](mailto:n.stone@exeter.ac.uk)

### Electronic Supplementary Information

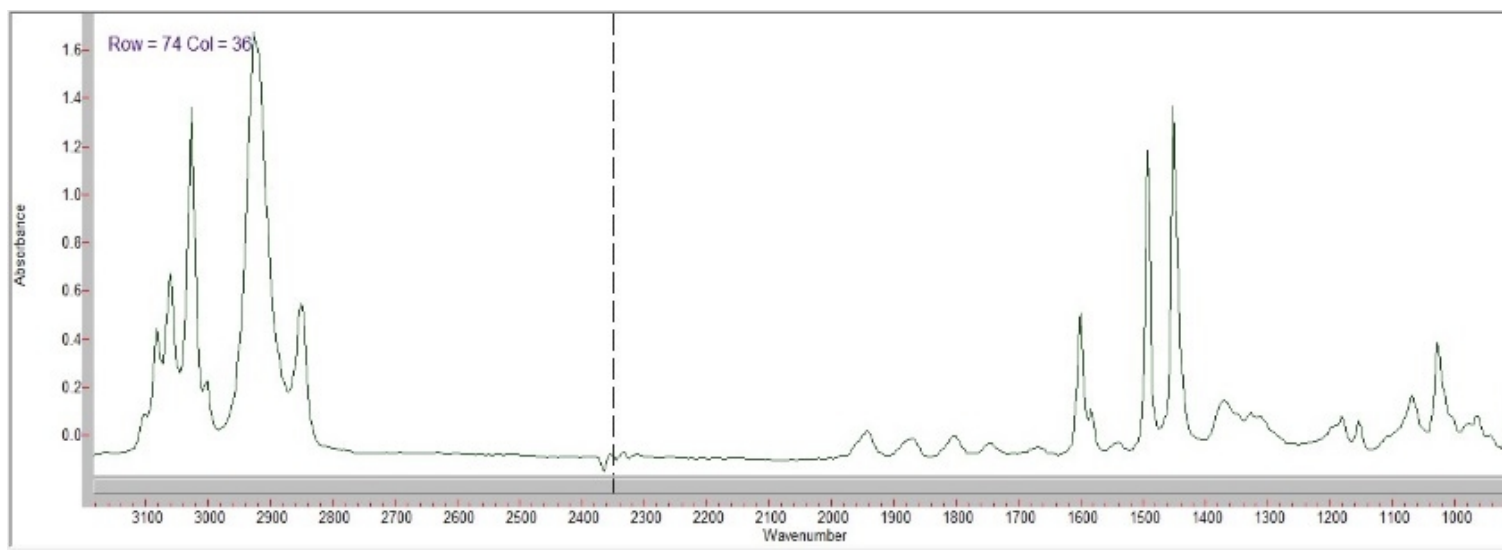

**SI 1:** Infrared spectrum of a polystyrene film standard in the spectral range of 900-3200 cm<sup>-1</sup>.

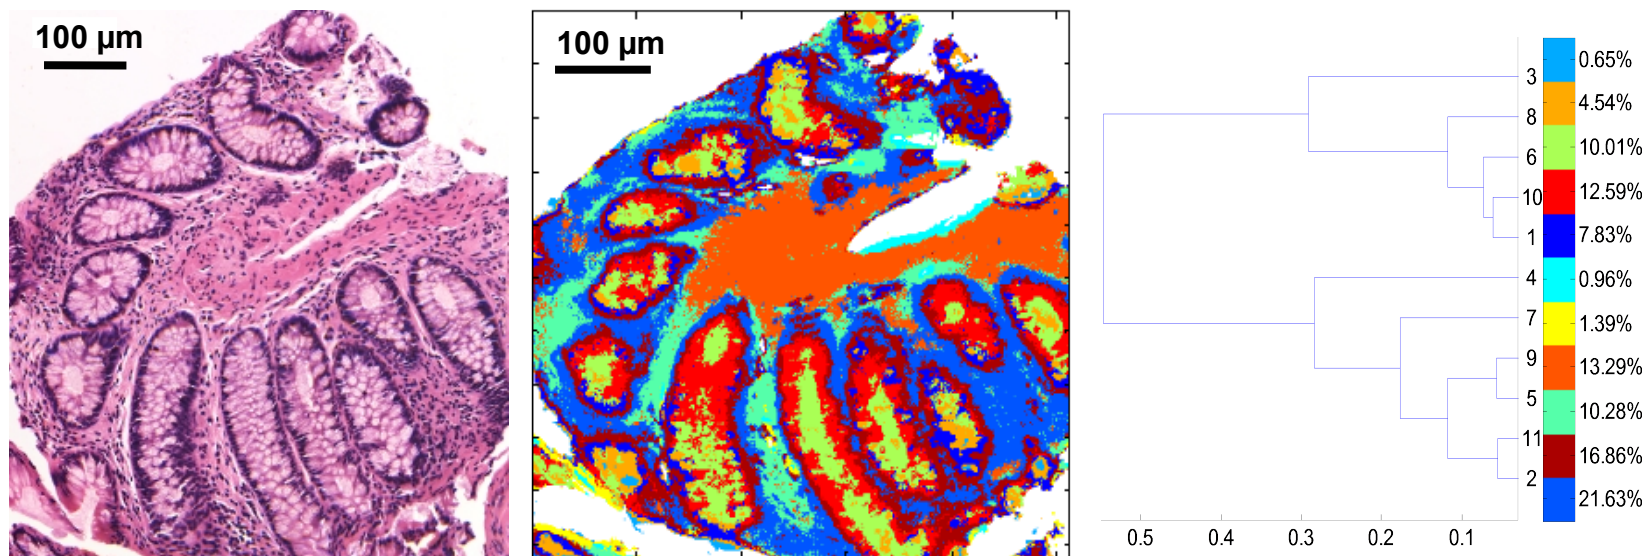

**SI 2:** Cluster analysis of a normal colon tissue (second column) using 11 cluster groups, measured using the high-magnification imaging set up ( $1.1 \times 1.1 \mu\text{m}^2$ ), in comparison to the reference HE stained image (left column). The corresponding dendrogram (third column) representing the heterogeneity of the clusters is also shown.

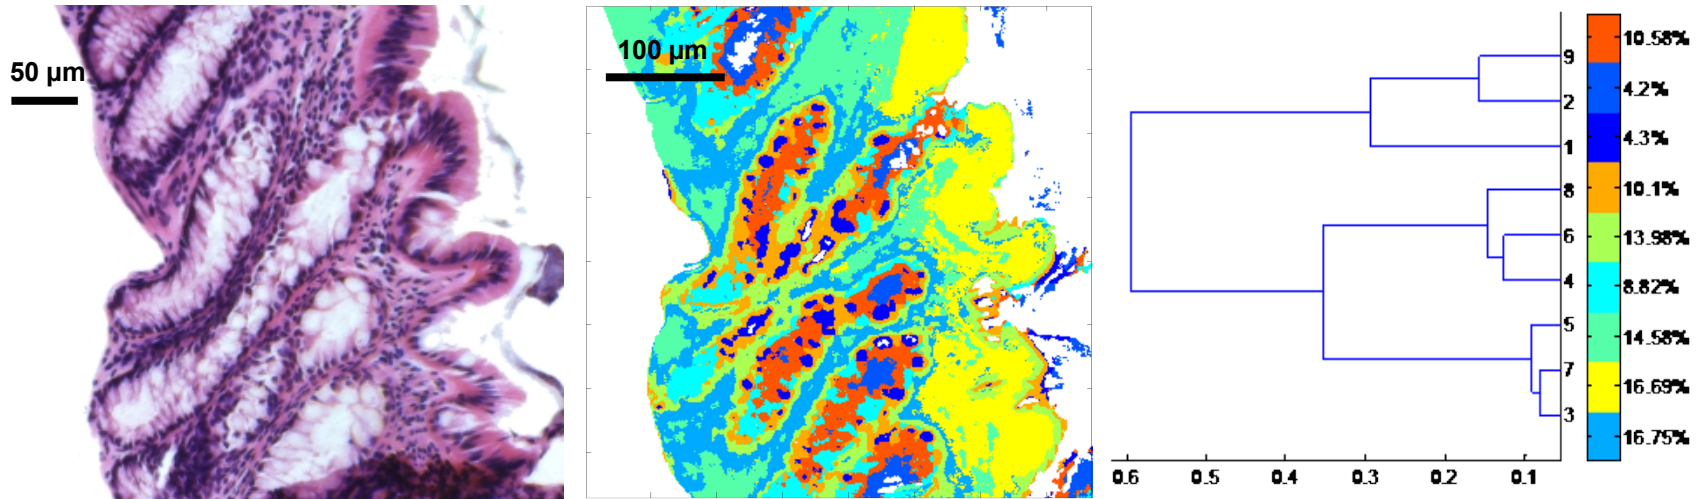

**SI 3:** Cluster analysis of a normal colon tissue (second column) using 9 cluster groups, measured using the high-magnification imaging set up ( $1.1 \times 1.1 \mu\text{m}^2$ ), in comparison to the reference HE stained image (left column). The corresponding dendrogram (third column) representing the heterogeneity of the clusters is also shown.
